# Supplementary material
Source: PubMed Central journal article supplement (PMC2553604)
Supplement: tpc.108.058941_1.pdf [file tpc.108.058941_1.pdf]

Supplemental Data, Achard et al., 2008 The cold-inducible CBF1 factor-dependent signalling pathway modulates the accumulation of the growth repressing DELLA proteins via its effect on gibberellin metabolism.

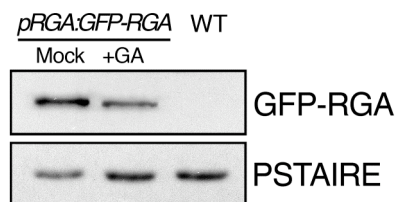

Supplemental Figure 1. *pRGA:GFP-RGA* transgenic line expresses a GFP-RGA fusion protein that is detectable by western-blot using an anti-GFP antibody. Immunodetection of GFP-RGA (by an antibody to GFP) in untreated (Mock) or GA<sub>3</sub>-treated (10 mM for 1 h) in 7 day-old *pRGA:GFP-RGA* seedling. WT sample serves as negative control. PSTAIRE serves as loading control.

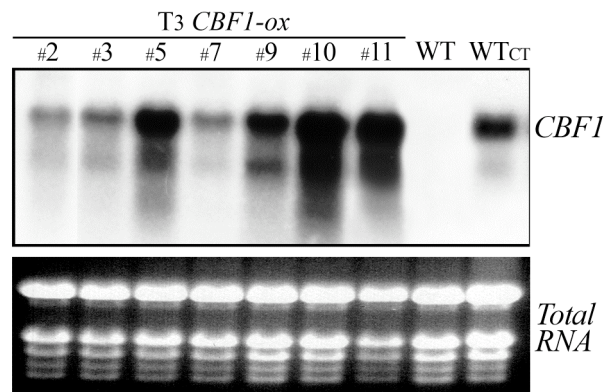

Supplemental Figure 2. Expression of *CBF1* in T3 transgenic *CBF1-ox* lines. Each lane was loaded with 15  $\mu$ g of total RNA prepared from 2 week-old T3 transgenic *CBF1-ox* lines and WT (2 h cold-treated [CT] and control). The northern-blot was hybridized with a specific probe for *CBF1*. The transgenic *CBF1-ox* line #9 expresses *CBF1* to similar level to WT plants that have been cold-treated for 2 h. This line was therefore selected for further studies.

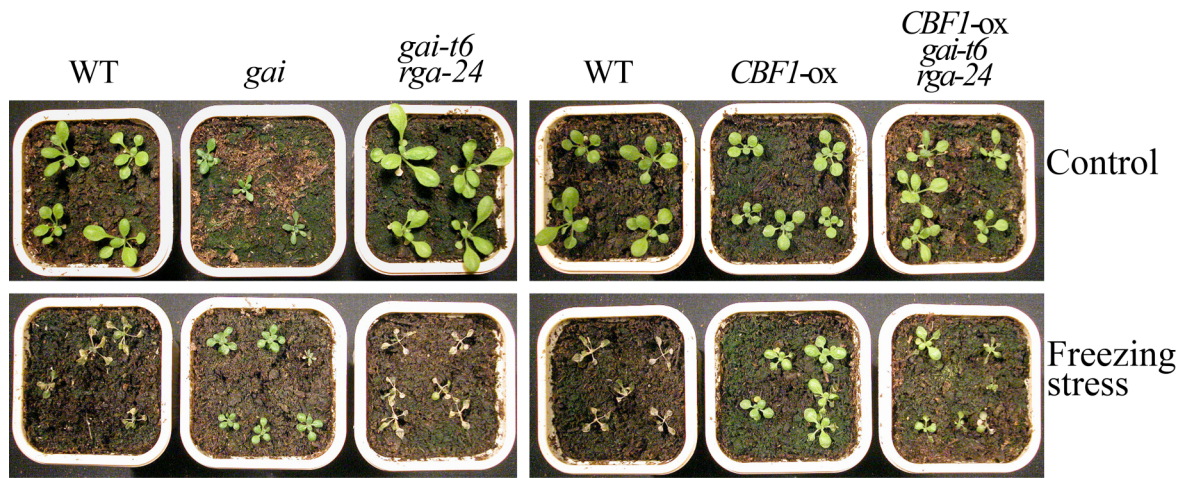

Supplemental Figure 3. *Arabidopsis* DELLAs contribute to freezing tolerance. 2 week-old WT, *gai*, *gai-t6 rga-24*, *CBF1-ox* and *CBF1-ox gai-t6 rga-24* plants grown in a growth room (22°C; 16 h photoperiod) were placed at -10°C for 24 h. Plants were then placed at 4°C for 6 h for recovery before being returned to the original growth room. Photographs were taken after 4 days of recovery under normal growth conditions. Plant survival rate is summarized in Figure 6.

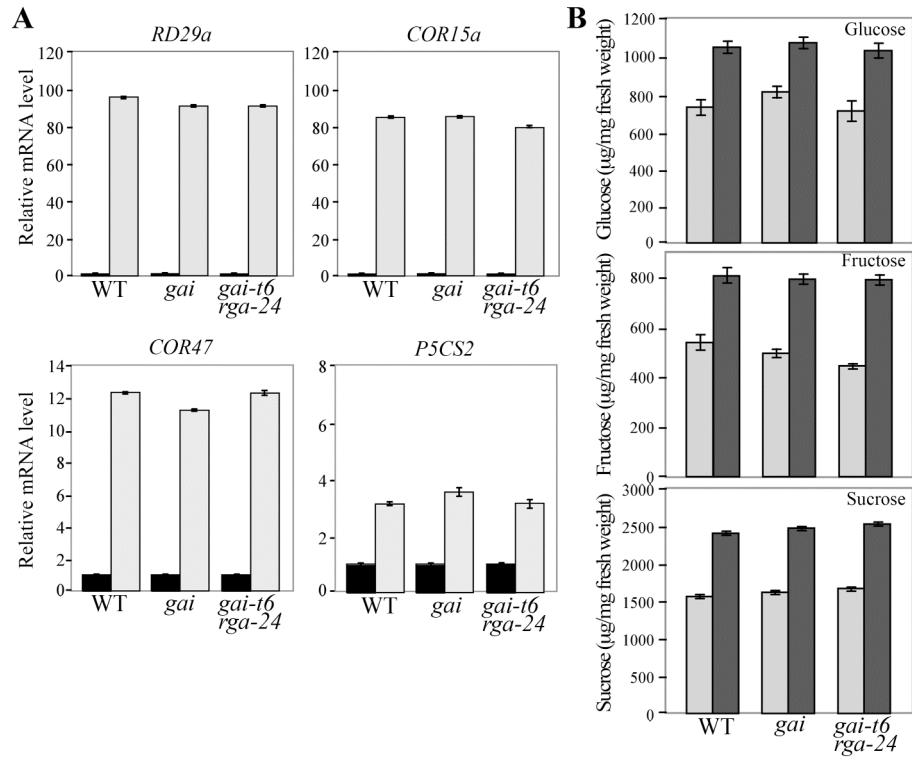

Supplemental Figure 4. Cold enhances both CBF-regulon and sugar levels via a DELLA-independent mechanism. (A) Relative levels of *RD29a*, *COR15a*, *COR47* and *P5CS2* gene transcripts (determined by real-time RT-PCR) in 2 week-old WT, *gai* and *gai-t6 rga-24* seedlings that had been subjected to 4 h cold (light grey) and controls non cold-treated (black). Data are means  $\pm$ SE. (B) Mean ( $\pm$ SE) total soluble sugars (glucose, fructose and sucrose) were determined from leaf tissue of 2 week-old WT, *gai* and *gai-t6 rga-24* cold-acclimated (dark grey) and non-acclimated (light grey) plants. The levels of individual sugars were determined by enzymatic assays.

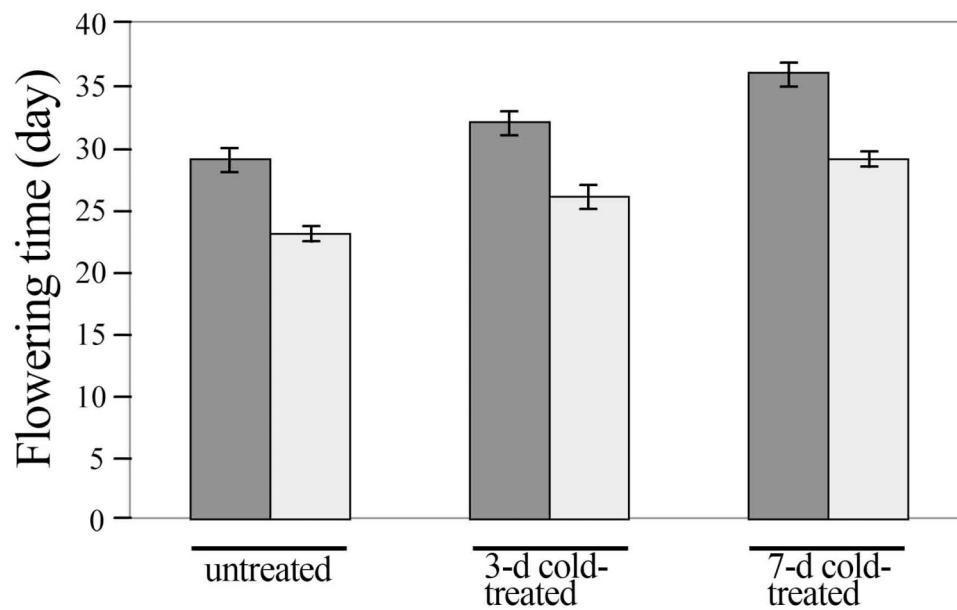

Supplemental Figure 5. Cold-treatment slows at the same level the vegetative growth of WT and quadruple-DELLA mutant plants. Flowering time (time at which 50% of plants had bolted;  $\pm$ SD,  $n > 20$ ) of WT (dark grey) and quadruple-DELLA mutant (light grey) plants grown in soil in long days (16-h photoperiod, 22°C). At 14 day-old, plants were cold-treated (4°C) for 3 or 7 days (and controls, untreated) as indicated, then replaced at 22°C.

**Primer list.**

*GA20ox1*: TTTCACCGGACGCTTCTCC and CGCAAACCGGAAAGAAAGG  
*GA20ox2*: CGATCTCTCAAGCCAAGACTCG and TCGCTGACGCCATGATTG  
*GA20ox3*: CAACCTCTCCAAGTCCCCTCA and AGTAGCCTCCGATGCCAAGC  
*GA3ox1*: TCCCGGATTCTTACAAGTGGAC and GCCGGAGGAGAAGGAGCA  
*GA3ox2*: CCCCTCCACGATTTCGGTA and TGCGAACCACATCAACTTGG  
*GA2ox1*: CTTCGCTGGACCTTCATTGAC and ACAACCTCTCGTCCTCATTGTCT  
*GA2ox2*: GGACCAAACGGTGACGTTG and GTACTCCTCCACCGACTCACG  
*GA2ox3*: GGCACACCCCTGCAATTTT and CCAGAAATTTGCTCGACATTCTC  
*GA2ox4*: GATGGCATGTGGGTTTCTGTC and TCTCCCGTTCGTCATCACCT  
*GA2ox6*: CCACGCAAATCCGACAGC and GCCAAATCTCTAACCGTGCGTA  
*RD29a*: GGGTAGAGATTATGTGGCGGAGA and TTCCTTTGTCGTCGTTTCCTTC  
*COR15a*: CTCTGCCGCCTTGTTTGC and CTGAGAAAGCTGCGGCGTA  
*COR47*: CCGAGCACGAGACACCAAC and TCCACGATCCGTAACCTCTGTT  
*P5CS2*: CGAAAATCCCAGTGCTAGGC and TGCCATGTCCAGTTTACCAGACT  
*GAPDH*: TTGGTGACAACAGGTCAAGCA and AAACCTTGTCGCTCAATGCAATC  
*At4g26410*: GAGCTGAAGTGGCTTCAATGAC and GGTCCGACATACCCATGATCC  
*RGA*: GATGTTGGGTTGGCACACTC and GACCTACCAAAACGATATATATA  
*GAI*: GCTCTGTTCAACGGCGGTG and GAAATTTTTCAATTACCTAATATAATG  
*RGL1*: GTTGCTTGGATGGCAAACGC and ATCATTTTCATTGGCCTGACCCTG  
*RGL2*: TGGCAGACGCGACCACTCAT and TACTCGTTCTCTTAACTCTCAA  
*RGL3*: ACCTCTAATCGCTGCATCGG and CTGTTGTTACATACACACATG  
*ELF1 $\alpha$* : TTGCTCCCACAGGATTGACCACTG and TCACTTCGCACCCTTCTTGACG  
*CBF1*: GCTGAGATGGCAGCTCGTGC and CTATCGAATATTAGTAACTCC
